# 1 **Contrasting mechanisms for hidden hearing loss: synaptopathy vs** 2 **myelin defects**

3 Maral Budak<sup>1</sup>, Karl Grosh<sup>2,3,5</sup>, Gabriel Corfas<sup>4,5\*</sup>, Michal Zochowski<sup>1,6\*¶</sup>, Victoria Booth<sup>7\*¶</sup>

4  
5 <sup>1</sup>Biophysics Program, University of Michigan, Ann Arbor, Michigan, United States of America

6 <sup>2</sup>Department of Mechanical Engineering, University of Michigan, Ann Arbor, Michigan, United  
7 States of America

8 <sup>3</sup>Department of Biomedical Engineering, University of Michigan, Ann Arbor, Michigan, United  
9 States of America

10 <sup>4</sup>Department of Otolaryngology Head and Neck Surgery, University of Michigan, Ann Arbor,  
11 Michigan, United States of America

12 <sup>5</sup>Kresge Hearing Research Institute, University of Michigan, Ann Arbor, Michigan, United States  
13 of America

14 <sup>6</sup>Department of Physics, University of Michigan, Ann Arbor, Michigan, United States of America

15 <sup>7</sup>Departments of Mathematics & Anesthesiology, University of Michigan, Ann Arbor, Michigan,  
16 United States of America

17  
18 \* Corresponding authors

19 e-mails: [vbooth@umich.edu](mailto:vbooth@umich.edu) (VB), [corfas@med.umich.edu](mailto:corfas@med.umich.edu) (GC), [michalz@umich.edu](mailto:michalz@umich.edu) (MZ)

20  
21 ¶These authors contributed equally to this work.

22

23

## 24 **Abstract**

25           Hidden hearing loss (HHL) is an auditory neuropathy characterized by normal hearing  
26 thresholds but reduced amplitude of the sound-evoked auditory nerve compound action potential  
27 (CAP). It has been proposed that in humans HHL leads to speech discrimination and intelligibility  
28 deficits, particularly in noisy environments. Animal models originally indicated that HHL can be  
29 caused by moderate noise exposures or aging, and that loss of inner hair cell (IHC) synapses could  
30 be its cause. A recent study provided evidence that transient loss of cochlear Schwann cells also  
31 causes permanent auditory deficits in mice which have characteristics of HHL. Histological  
32 analysis of the cochlea after auditory nerve remyelination showed a permanent disruption of the  
33 myelination patterns at the heminode of type I spiral ganglion neuron (SGN) peripheral terminals,  
34 suggesting that this defect could be contributing to HHL. To shed light on the mechanisms of  
35 different HHL scenarios and to test their impact on type I SGN activity, we constructed a reduced  
36 biophysical model for a population of SGN peripheral axons. We found that the amplitudes of  
37 simulated sound-evoked SGN CAPs are lower and have greater latencies when the heminodes are  
38 disorganized, i.e. they are placed at different distances from the hair cell rather than at the same  
39 distance as seen in the normal cochlea. Thus, our model confirms that disruption of the position of  
40 the heminode causes desynchronization of SGN spikes leading to a loss of temporal resolution and  
41 reduction of the sound-evoked SGN CAP. We also simulated synaptopathy by removing high  
42 threshold IHC-SGN synapses and found that the amplitude of simulated sound-evoked SGN CAPs  
43 decreases while latencies remain unchanged, corresponding to what has been observed in noise  
44 exposed animals. This model can be used to further study the effects of synaptopathy or  
45 demyelination on auditory function.

46

## 47 **Author summary**

48           Hidden hearing loss is an auditory disorder caused by noise exposure, aging or peripheral  
49 neuropathy which is estimated to affect 12-15% of the world's population. It is a 'hidden' disorder  
50 because subjects have normal hearing thresholds, i.e., the condition cannot be revealed by standard  
51 audiological tests, but they report difficulties in understanding speech in noisy environments.  
52 Studies on animal models suggest two possible pathogenic mechanisms for hidden hearing loss:  
53 (1) loss of synapses between inner hair cells and auditory nerve fibers, and (2) disruption of  
54 auditory-nerve myelin. In this study, we constructed a computational model of sound-evoked  
55 auditory neuron fiber activity and auditory nerve compound action potential to understand how  
56 each one of these mechanisms affects nerve transmission. We show that disruption of auditory-  
57 nerve myelin desynchronizes sound-evoked auditory neuron spiking, decreasing the amplitude and  
58 increasing the latency of the compound action potential. In addition, elongation of the initial axon  
59 segment may cause spike generation failure leading to decreased spiking probability. In contrast,  
60 the effect of synapse loss is only to decrease the probability of firing, thus reducing the compound  
61 action potential amplitude without disturbing its latency. This model, which accurately represents  
62 the in vivo findings, could be useful to make further predictions on the consequences of HHL and  
63 extend it to explore the impact of synaptopathy and myelinopathy on hearing.

64

## 65 **Introduction**

66           Hidden hearing loss (HHL) is defined as an auditory neuropathy characterized by changes  
67 in neural sound-evoked output of the auditory nerve (AN) without hearing threshold elevation [1].  
68 The prevalence of HHL has been estimated at 12-15% based on recent surveys where subjects with  
69 normal hearing thresholds reported difficulties in hearing, especially in noisy environments [2, 3].

70 HHL has been detected in animal models and humans by measuring the neural responses to  
71 suprathreshold sound via tests, such as auditory brainstem response (ABR), a far-field response  
72 measured by head-mounted electrodes, or compound action potential (CAP), a near-field response  
73 measured from the round window. CAP and the first peak of ABR (ABR peak 1) represent the  
74 activity of type I spiral ganglion neurons (SGNs) in response to sounds [1].

75         There is mounting evidence that HHL can be caused by noise exposure, aging or peripheral  
76 myelin neuropathy [4-7]. After exposure to moderate noise, animals and humans have temporary  
77 shifts in auditory thresholds but permanent decreases in amplitude of ABR peak 1 [4-7]. Kujawa  
78 and Liberman (2009) showed that animals with this type of auditory pathology have a normal  
79 complement of hair cells and SGNs, but present with loss of a subset of synaptic connections  
80 between inner hair cells (IHCs) and SGNs. They also found that the degree of synapse loss  
81 correlates with the magnitude of the decrease in suprathreshold responses, supporting the idea that  
82 cochlear synaptopathy is the mechanism for noise-induced HHL [4]. Similar observations were  
83 made regarding aging, i.e. HHL and synapse loss are the first signs of age-related hearing loss and  
84 have the same time-course [5]. Importantly, it has been suggested that moderate noise and aging  
85 primarily affect synapses associated with high threshold/low spontaneous rate SGN fibers [8].  
86 Since these fibers can respond to sound in high background noise even when the others have been  
87 saturated, their loss should lead to difficulties in processing speech in noisy environments [8].

88         Auditory processing requires proper myelination of auditory nerves [9]. Therefore, it has  
89 been hypothesized that peripheral neuropathy resulting from myelin disorders may be another  
90 cause of HHL. Individuals with peripheral neuropathies, such as Guillain-Barré Syndrome (GBS)  
91 [10] and Charcot-Marie-Tooth (CMT) disease [11] have been reported to have perceptual  
92 difficulties even when having normal auditory thresholds, indicating HHL. A recent study by Wan

93 and Corfas (2017) showed that transient demyelination also causes HHL in mice, i.e. reduced ABR  
94 peak 1 amplitude with normal ABR thresholds [6]. In that study, acute demyelination was induced  
95 using genetically modified mice. This demyelination resulted in decreased ABR peak 1 amplitudes  
96 and increased ABR peak 1 latency without auditory threshold elevation or IHC-SGN synapse loss.  
97 Remarkably, these changes persisted even after remyelination of SGN fibers. Further investigation  
98 with immunostaining demonstrated that the organization of the heminodes, the nodal structures  
99 closest to the IHCs where action potentials are generated, were disrupted. These results suggested  
100 that the location of SGN heminodes is critical for normal auditory responses and that their  
101 disruption causes HHL.

102 In this study, we investigated the implications of these two HHL mechanisms,  
103 synaptopathy and myelinopathy, on sound-evoked spike generation and timing in SGNs. For this  
104 purpose, we constructed a reduced biophysical model consisting of a population of SGN fibers to  
105 investigate how synapse loss or disruption of myelin organization affect spike generation and  
106 transmission. Synaptopathy and myelinopathy were implemented by removing synapses and  
107 varying the position of SGN heminodes, respectively. Model results show that heminode  
108 disruption causes decay of the amplitude and increases the latency of sound-evoked CAPs. In  
109 addition, significant elongation of the initial axon segment causes spike generation failure leading  
110 to decreased spiking probability. In contrast, synaptopathy, solely decreases probability of firing,  
111 subsequently decreasing CAP peak amplitude without affecting its latency. These results are  
112 consistent with experimental observations [4, 6].

113

## 114 **Methods**

### 115 **SGN fiber model**

116           Type I SGNs are bipolar neurons with peripheral axon segments innervating IHCs and  
117 central axon segments projecting into cochlear nucleus (Fig 1A) [12]. In this study, a  
118 compartmental model of peripheral axons of type I SGNs was constructed using the NEURON  
119 simulator (version 7.6.2, [13]) as schematized in Figs 1B and C. For simplicity, we refer to  
120 peripheral axons of type I SGNs as SGN fibers, throughout the paper. Each fiber consists of an  
121 unmyelinated segment (length  $L_u$ ), a heminode (length  $L_h$ ) and 5 myelin sheaths following the  
122 heminode, separated by 4 nodes. Each compartment has passive membrane properties described  
123 by specific capacitance ( $C_m$ ) and specific membrane resistance ( $R_m$ ). Specific cytoplasmic  
124 resistance ( $R_a$ ) between each consecutive compartment was modified to obtain the speed of the  
125 action potential as 12-14m/s [14], based on the neural conduction velocity measurements of human  
126 auditory nerve [15]. Sodium and potassium channels were inserted along the SGN fibers, except  
127 the myelin sheaths, which only had passive membrane properties. The nominal conductances of  
128 both channel types at the unmyelinated segment was 15 times less than the nodes and the heminode  
129 [16], therefore action potential was initiated first at the heminode. The parameters for channel  
130 dynamics were taken from [14] (see S1 File), the stochastic channels in [14] were converted into  
131 deterministic ones for simplicity. This was done by multiplying channel density with the single  
132 ion channel conductance to obtain deterministic conductance values (see Table 1 for all  
133 parameters). The Nernst potentials for the ions  $\text{Na}^+$  ( $E_{\text{Na}}$ ) and  $\text{K}^+$  ( $E_{\text{K}}$ ) were set to 66 and -88 mV,  
134 respectively, and the resting potential ( $E_{\text{Rest}}$ ) was -78 mV [17]. Simulations were done at 37°C. The  
135 differential equations were solved by fully implicit backward Euler method with time step  $5\mu\text{s}$   
136 implemented in the NEURON simulation environment (see S1 File).

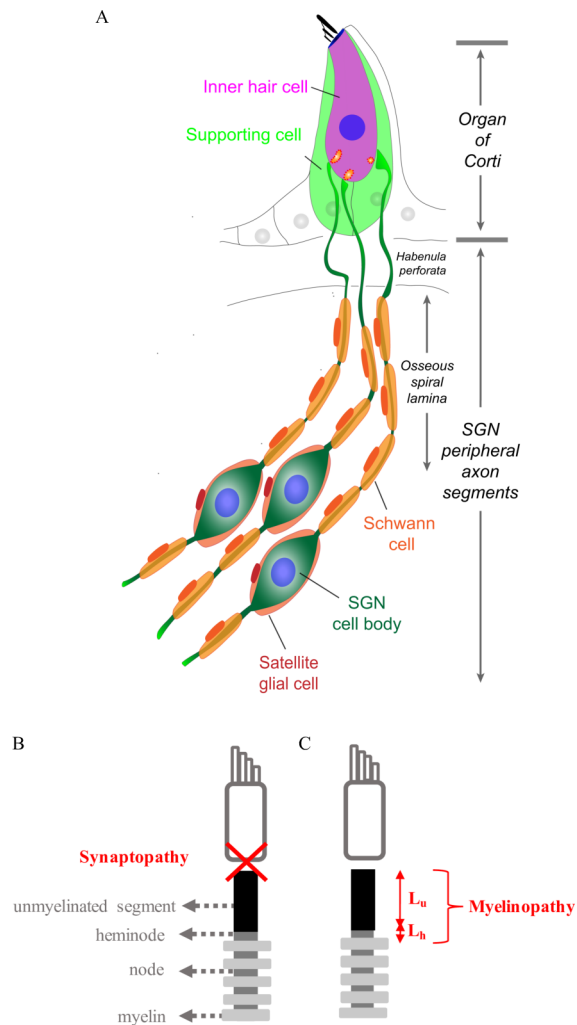

137

138 **Fig 1. Diagram of model SGN fiber illustrating two mechanisms of hidden hearing loss**

139 (A) Schematic illustration of type I SGNs, bipolar neurons innervating IHCs via myelinated

140 peripheral projections. (B,C) Model peripheral fibers of type I SGNs (SGN fiber) consist of an

141 unmyelinated segment at the peripheral end adjacent to the site of IHC synapses, followed by a

142 heminode and 5 myelin sheaths with 4 nodes between them. Two mechanisms of hidden hearing

143 loss are simulated: (B) synaptopathy, modeled by removing IHC-AN synapses, and (C)

144 myelinopathy, modeled by varying the lengths of the unmyelinated segment ( $L_u$ ) or the heminode

145 ( $L_h$ ).

146

147

148 **Table 1: Morphological, electrical and ion channel parameters of the different parts of a**  
 149 **normal SGN fiber.** Values as in [16] except for  $R_a$  and myelinated segment length which were  
 150 modified for human SGN fibers.

| Parameters                                 | Unmyelinated segment | Heminode | Myelin  | Node    |
|--------------------------------------------|----------------------|----------|---------|---------|
| Length ( $\mu\text{m}$ )                   | 10                   | 1        | 40      | 1       |
| Diameter ( $\mu\text{m}$ )                 | 1.2                  | 1.2      | 2.2     | 1.2     |
| $g_{\text{Na}}$ ( $\text{S}/\text{cm}^2$ ) | 0.01208              | 0.1812   | 0       | 0.1812  |
| $g_{\text{K}}$ ( $\text{S}/\text{cm}^2$ )  | 0.015                | 0.225    | 0       | 0.225   |
| $R_m$ ( $\text{ohm}\times\text{cm}^2$ )    | 1662                 | 1662     | 1300000 | 1662    |
| $C$ ( $\mu\text{F}/\text{cm}^2$ )          | 0.05125              | 0.05125  | 0.0012  | 0.05125 |
| $R_a$ ( $\text{ohm}\times\text{cm}$ )      | 8291.4               |          |         |         |

151  $g_{\text{Na}}$ , maximal sodium conductance;  $g_{\text{K}}$ , maximal potassium conductance;  $R_m$ , specific membrane  
 152 resistance;  $C$ , specific capacitance;  $R_a$ , specific cytoplasmic resistance.

153

### 154 Sound representation

155 Increasing sound level increases the probability of neurotransmitter release from IHCs  
 156 [18], therefore we defined the sound stimulus in terms of a release probability  $p_i$  at each IHC-SGN  
 157 synapse (Fig 2A). Since type I SGNs also fire spontaneously [19], we set a release probability of  
 158  $p_{\text{spont}}$  in the absence of sound. To simulate the activity of SGNs in response to sound stimulus as  
 159 described in [20], release probability was first increased sharply up to a defined peak ( $p_{\text{spont}}+p_{\text{peak}}$ ),  
 160 then allowed to decay due to adaptation to a constant level at the half-peak ( $p_{\text{half}} = p_{\text{spont}} +$   
 161  $\frac{p_{\text{peak}}}{2}$ ) until the end of the sound stimulus. Thus, the release probability function  $p_i(t)$  was defined  
 162 as:

163



164

$$p_i(t) = \begin{cases} p_{spont} & \text{for } t < t_{start} \text{ and } t > t_{stop} \\ p_{spont} + \left(\frac{p_{peak}}{0.4}\right) \times \left(e^{\frac{-(t-t_{start})}{0.8}} - e^{\frac{-(t-t_{start})}{0.3}}\right) & \text{for } t_{start} < t < t_{half} \\ p_{spont} + p_{half} & \text{for } t_{half} < t < t_{stop} \end{cases} \quad (1)$$

165

166 where  $t_{half}$  was the time at which the function decays to  $p_{spont} + p_{half}$  after passing  $p_{peak}$ ,  $t_{start}$  and  $t_{stop}$

167 were the times when sound stimulus starts and ends, respectively.

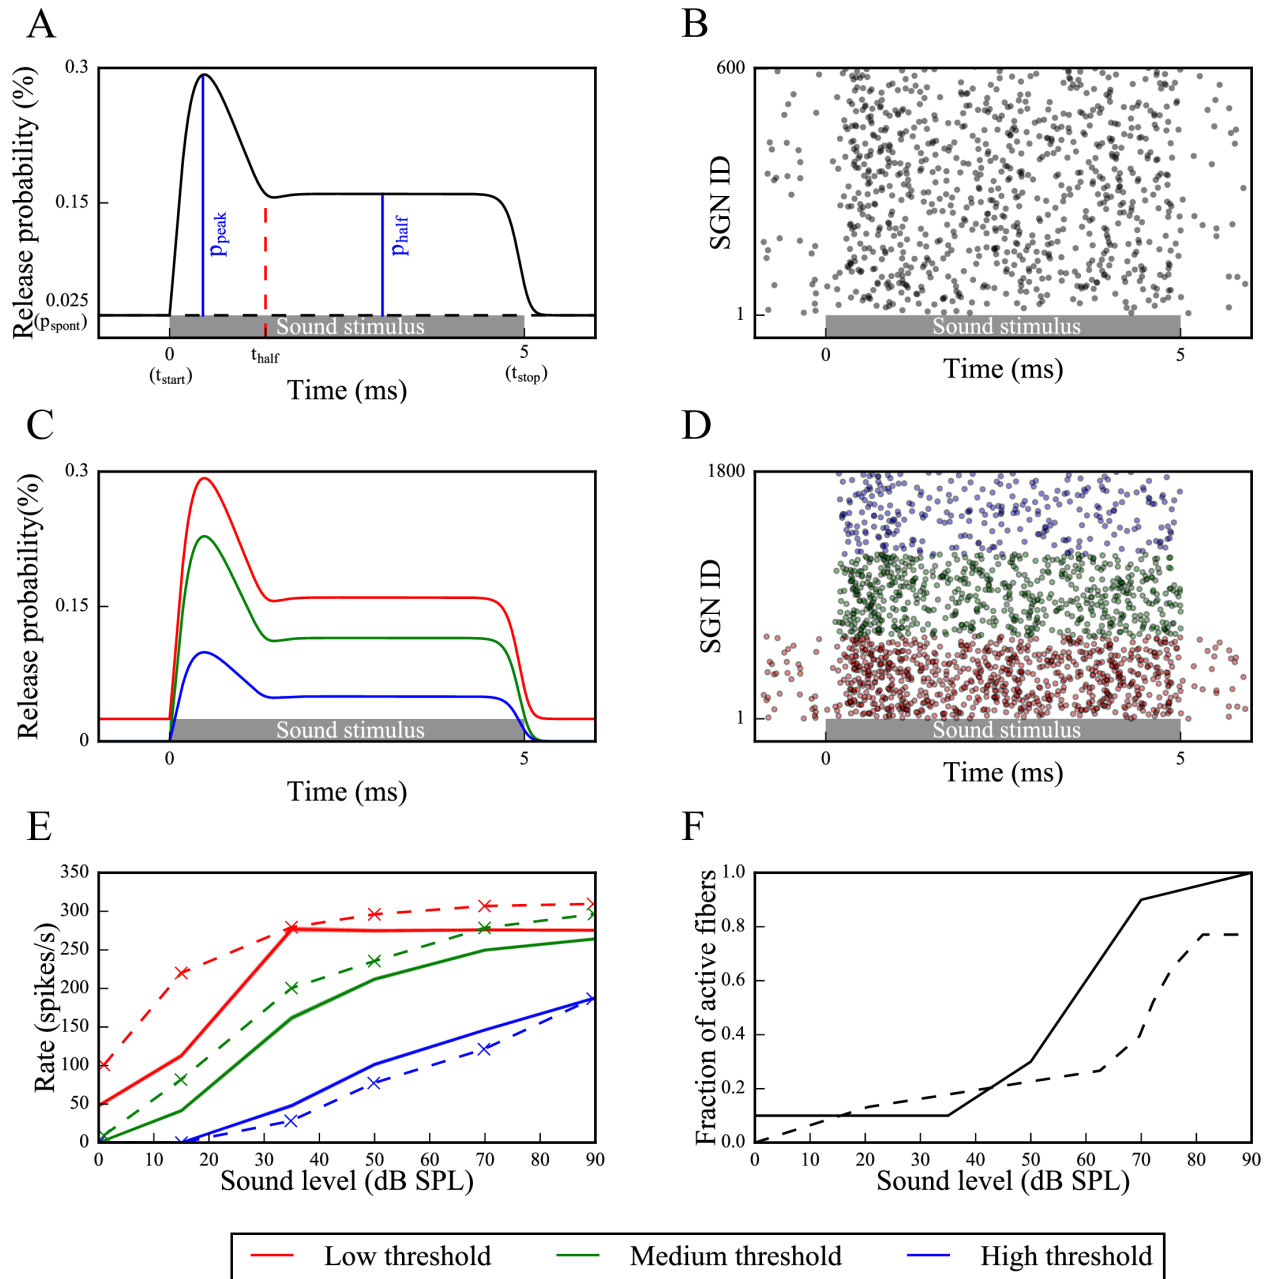

168

169 **Fig 2. Sound-evoked activity of low, medium and high threshold SGN fibers results from**  
 170 **increased vesicle release probabilities from corresponding IHC-SGN synapses**

171 (A) Sound stimuli is modeled as an increased vesicle release probability from IHCs where release  
 172 times are determined by a Poisson process ( $p_{\text{spont}}$ : spontaneous release probability,  $p_{\text{peak}}$ : maximum  
 173 release probability,  $p_{\text{half}}$ : release probability after adaptation,  $t_{\text{start}}$ : sound start time,  $t_{\text{stop}}$ : sound end  
 174 time,  $t_{\text{half}}$ : adaptation start time). For each release event, the corresponding SGN fiber is stimulated  
 175 with a brief external current pulse, resulting in spiking activity; cumulative activity of an SGN  
 176 fiber population is shown in (B), where gray dots represent spike times of each SGN fiber in a  
 177 population defined as different SGN fiber IDs. (C) Three groups of SGN fibers, low (LT), medium

178 (MT) and high (HT) threshold, were simulated based on their spontaneous firing rates and  
179 saturation profiles in response to sound, by defining  $p_{\text{peak}}$  and  $p_{\text{spont}}$  for each fiber type at each  
180 sound level. (D) Based on the release probabilities, different fiber types exhibit different  
181 cumulative responses (red dots: low threshold, green dots: medium threshold, blue dots: high  
182 threshold). Panels A-D are example simulations for simulated 50dB SPL. (E) The trend of spike  
183 rates of each fiber type for various sound levels in our model (solid lines) are comparable to  
184 experimental results (dashed lines) (Data taken from [19]). (F) For higher sound levels, due to the  
185 recruitment of SGN fibers with CFs near that of the simulated sound frequency, the fraction of  
186 activated SGN fibers increases for sound levels higher than 35dB SPL. At 90dB SPL, all 6000  
187 fibers are activated (solid line: our model, dashed line: calculated based on spiral ganglion cell  
188 densities for different CFs [21] and IHC tuning curves [22]).  
189

190 IHC-SGN synaptic release probability  $p_i(t)$  was used to determine a Poisson process of  
191 IHC release that governed brief external stimuli to the corresponding nerve fiber to induce action  
192 potential generation. The external stimuli mimicking synaptic release from IHCs were simulated  
193 in the form of external current pulses with amplitude 0.024 nA and duration 0.05 ms ( $I_{\text{app}}$ ) applied  
194 at the beginning of the unmyelinated segment, unless otherwise stated (S3A Fig). The amplitude  
195 and duration of the stimuli were chosen to be close to the threshold stimulation needed to result in  
196 action potential generation at the heminode of putative control ( $L_u=10 \mu\text{m}$ ,  $L_h=1 \mu\text{m}$ ) fibers. The  
197 time of the action potential at the center of the heminode was taken as output (Fig 2B).

198 In our model, to reproduce experimentally observed shape of the stimulus mediated release  
199 [6], we used 5 ms long sound stimuli ( $t_{\text{stop}} - t_{\text{start}} = 5\text{ms}$ ) and set the time from stimulus  
200 initiation to release probability reaching  $p_{\text{half}}$ , i.e. ( $t_{\text{half}} - t_{\text{start}}$ ), to 1.4ms [20]. We varied  $p_{\text{spont}}$  and  
201  $p_{\text{peak}}$  for different sound levels and fiber types (Table 2) to obtain experimental response properties  
202 [19].  
203  
204

205 **Table 2: Spontaneous ( $p_{\text{spont}}$ ) and maximum ( $p_{\text{peak}}$ ) release probabilities for low- (LT),**  
206 **medium- (MT) and high-threshold SGN fibers (HT)**  
207

|                    |           | LT      | MT     | HT      |
|--------------------|-----------|---------|--------|---------|
| $p_{\text{spont}}$ |           | 0.00025 | 0      | 0       |
| $p_{\text{peak}}$  | 0 dB SPL  | 0       | 0      | 0       |
|                    | 15 dB SPL | 0.0007  | 0.0004 | 0       |
|                    | 35 dB SPL | 0.0027  | 0.0017 | 0.00045 |
|                    | 50 dB SPL | 0.0027  | 0.0023 | 0.001   |
|                    | 70 dB SPL | 0.0027  | 0.0028 | 0.0015  |
|                    | 90 dB SPL | 0.0027  | 0.003  | 0.002   |

216  
217  $p_{\text{spont}}$ , spontaneous release probability;  $p_{\text{peak}}$ , maximum release probability; LT, low-threshold SGN  
218 fiber; MT, medium-threshold SGN fiber; HT, high-threshold SGN fiber  
219

## 220 **Defining different sound levels and fiber types**

221 SGNs can be classified into 3 groups depending on their spontaneous firing properties,  
222 thresholds for sound-evoked activity and saturation profiles, namely low threshold (LT), medium  
223 threshold (MT) and high threshold (HT) fibers. Based on the measurements reported in [19], we  
224 modeled the properties of these three fiber groups as follows (Figs 2C-E): LT fibers have high  
225 spontaneous rates (18-100 spikes/s), low dynamic ranges, and reach their maximum discharge rate  
226 within approximately 30 dB sound pressure level (SPL). MT fibers have lower spontaneous firing  
227 (between 0.5 and 18 spikes/s), higher dynamic ranges, and show slower increase and saturation of  
228 spike rates with increasing SPL compared to LT fibers. HT fibers have very low spontaneous firing  
229 rates (<0.5 spikes/s), and response thresholds higher than ~20 dB SPL. For higher SPL, their spike  
230 rate increases linearly with sound intensity, therefore their dynamic range is the highest [19].

231 In our model, SPL is simulated by varying the peak probability,  $p_{\text{peak}}$ , of the IHC-SGN  
232 synaptic release probability function. The fiber type response properties are obtained by defining  
233 spontaneous release probability,  $p_{\text{spont}}$ , and scaling  $p_{\text{peak}}$  for each sound level. Figs 2C and 2D show  
234 IHC-SGN synaptic release probability functions and spike firing, respectively, for 70dB SPL for  
235 each fiber type (see Table 2 for all sound levels). For simplicity, we assumed MT and HT fibers  
236 do not fire spontaneously.

237 The intensity of sound stimuli affects the number of recruited type I SGNs as well. At lower  
238 sound levels, only the fibers with the characteristic frequencies (CFs) close to the stimulus fire. At  
239 higher SPL, the spatial profile of excitation spreads, and fibers with a broader range of CFs also  
240 respond to the stimulation. To introduce the recruitment of more fibers with increasing SPL, we  
241 considered the IHC tuning curves [22] and the density of SGNs based on their CF [21], and used  
242 600 fibers for sound intensities of 35dB SPL and lower, 1800 fibers for 50 dB SPL, 5400 fibers  
243 for 70 dB SPL and 6000 for 90 dB SPL, with equal numbers of LT, MT and HT fibers (Fig 2F).

244

### 245 **Analyzing spike trains obtained from simulations**

246 In response to simulated sound stimulus, each model SGN fiber fires a sequence of spikes (Fig  
247 2D). We used three methods to analyze SGN fiber spike trains:

#### 248 ***Measurement of time intervals between non-identical spike trains of SGN fiber populations.***

249 This metric, modified from a shuffled autocorrelogram measure in [23], was used to quantify  
250 temporal properties of SGN fiber spiking within a population based on the time intervals of the  
251 spikes between each non-identical pair of spike trains within the population. From all possible  
252 non-identical pairs of spike trains within a population, forward time intervals were measured  
253 between each spike  $i$  of the first spike train and spikes of the second spike train falling between

254 the  $i$ -th and  $(i+1)$ -st spikes (Fig 3A). All time intervals from all pairs were tallied in a histogram  
 255 and the histogram was reflected over y-axis, since each forward time interval of a pair  $(x,y)$  is a  
 256 backward time interval of the pair  $(y,x)$ .

A

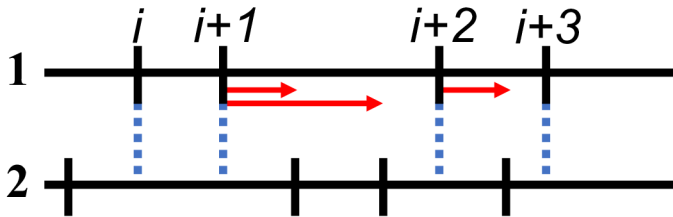

B

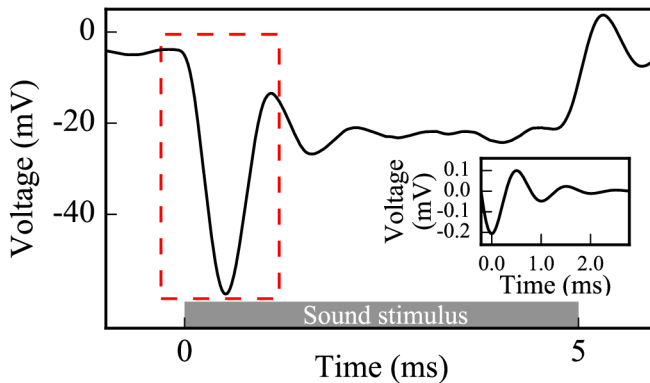

C

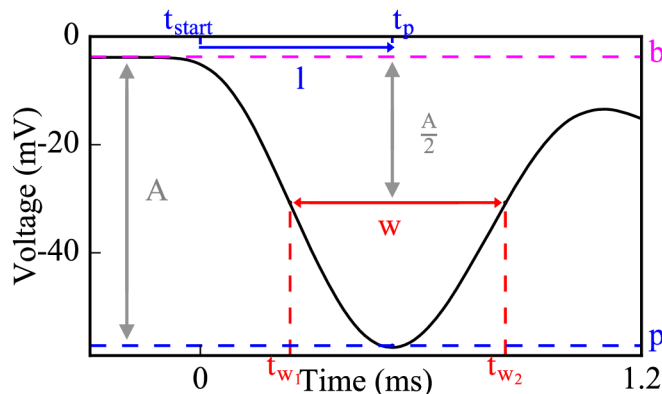

257

258 **Fig 3. Methods used to evaluate cumulative activity of SGN fiber populations: pairwise spike**  
 259 **time differences (A) and simulated CAP (B,C).**

260 (A) For each non-identical pair of spike trains from an SGN fiber population, forward time  
 261 intervals are measured between each spike  $i$  of the spike train 1 and all spikes of the spike train 2  
 262 falling between  $i$  and  $i+1$ . Standard deviations of the distributions of these time intervals are  
 263 calculated to evaluate synchronous spike timing in the SGN fiber population. (B) Each spike in

264 Fig 2D is convolved with the unitary response of CAP [the inset of (B)] and convolutions from  
265 each spike are summed up to obtain a simulated CAP of the SGN fiber population. (C) Amplitude,  
266 latency and width are measured from the first peak of the simulated CAP [dashed rectangle in (B)  
267 is zoomed in for (C)] (b: baseline, p: peak, A: amplitude of the peak,  $t_p$ : peak time, l: latency, w:  
268 width,  $t_{w1}$ : half amplitude time before  $t_p$ ,  $t_{w2}$ : half amplitude time after  $t_p$ ).

269

270 **Convolution into the unitary response of compound action potential (CAP).** To yield a  
271 cumulative response of the activity of the population of SGN fibers and to be able to compare  
272 model results with in vivo ABR P1 results, we convolved each spike with the unitary response and  
273 summed them up to generate a population CAP (Fig 3B). In this study, we considered this  
274 computed CAP as equivalent to ABR P1. The unitary response  $U(t)$  was described as in [24]:

275

$$U(t) = \begin{cases} A \times e^{-k(t-0.288)} \times \sin(2\pi f(t - 0.288)) & \text{for } -0.215 \leq t \leq 2.785 \\ 0 & \text{otherwise} \end{cases} \quad (2)$$

276 where  $A = 0.14\mu V$ ,  $k = 1.44ms^{-1}$ ,  $f = 0.994ms^{-1}$  and  $t$  is the time (Fig 3B inset).

277 Fifty population CAPs were averaged to measure the width (w), amplitude (a) and latency  
278 (l) of the initial CAP peak more accurately, which were computed as:

$$279 \quad a = |p - b| \quad (3)$$

$$280 \quad l = t_p - t_{start} \quad (4)$$

$$281 \quad w = t_{w2} - t_{w1} \quad (5)$$

282 where  $p$  is the peak voltage,  $b$  is the baseline voltage,  $t_p$  is the time when the voltage equals  $p$ , and  
283  $t_{w1}$  and  $t_{w2}$  are the times when the voltage equals  $-\left(|b| + \frac{a}{2}\right)$  (the half-peak) before and after  $t_p$ ,  
284 respectively (Fig 3C).

285

286 ***Calculating spike probability and latency for each SGN fiber population.*** The probability that  
287 release events at IHC-SGN synapses resulted in spikes at the heminodes of an SGN fiber  
288 population was calculated by dividing the number of spikes at the heminode of each SGN fiber by  
289 the number of release events and averaging over all fibers within a population. Spike latency of  
290 an SGN fiber population was calculated by the time difference between a spike and a release  
291 preceding that spike averaged over all spikes of that population.

292

## 293 **Results**

294 Using the model of the type I SGN fiber population, we investigated the effects of  
295 myelinopathy and synaptopathy on type I SGN spike generation and spike timing. We first  
296 simulated different myelinopathy scenarios by varying the length of the initial unmyelinated  
297 segment  $L_u$  (Fig 1C, from a putative control value of 10  $\mu\text{m}$ ) and the first heminode length  $L_h$  (from  
298 a control value of 1  $\mu\text{m}$ ) for all (i.e. LT, MT and HT) fibers. Next, we simulated synaptopathy by  
299 removing IHC-SGN synapses (Fig 1B) considering the cases where only synapses on HT fibers  
300 are affected or synapses on all fiber types are affected. Lastly, we investigated the combined effects  
301 of myelinopathy and synaptopathy.

302

### 303 **Effects of myelinopathy on SGN population activation patterns**

304 Mouse studies have shown that transient demyelination and the subsequent remyelination  
305 alters the position of SGN heminodes, resulting in heminodes that are positioned farther from the  
306 IHC-SGN synapse and at variable positions, in contrast to healthy SGN fibers where heminodes  
307 on all fibers are aligned [6]. To identify the effect of this heterogeneity of heminode locations on  
308 SGN spike timing, we first considered a population of only LT fibers with different ranges of  $L_u$



309 values (Fig 4). Here, we denote 0% increase as the putative control fiber length ( $L_u=10\ \mu\text{m}$ ), while  
310 100% increase means  $L_u$  was varied between 10 and 20  $\mu\text{m}$  across the population. We assessed the  
311 level of synchronization of spikes across the SGN fiber population by stimulating all fibers with  
312 the same 90dB simulated SPL with the identical IHC release pattern. As heterogeneity of  $L_u$  values  
313 was increased (Fig 4A), the population spike rate decreased reflecting spike generation failure on  
314 fibers with large  $L_u$ . At the same time, variability in spike timing increased as illustrated in spike  
315 raster plots (Figs 4B, D, F, H show a portion of the generated spike trains, insets show timing of  
316 first spikes) and computed pairwise spike time intervals (Figs 4C, E, G, I, see Methods). These  
317 disruptions in spike generation and timing resulted in increased standard deviation of the  
318 distribution of pairwise spike time differences across the population (Fig 4A). These initial  
319 observations suggest that myelinopathy not only disrupts spike timing of SGNs within a  
320 population, but also leads to the loss of spikes.

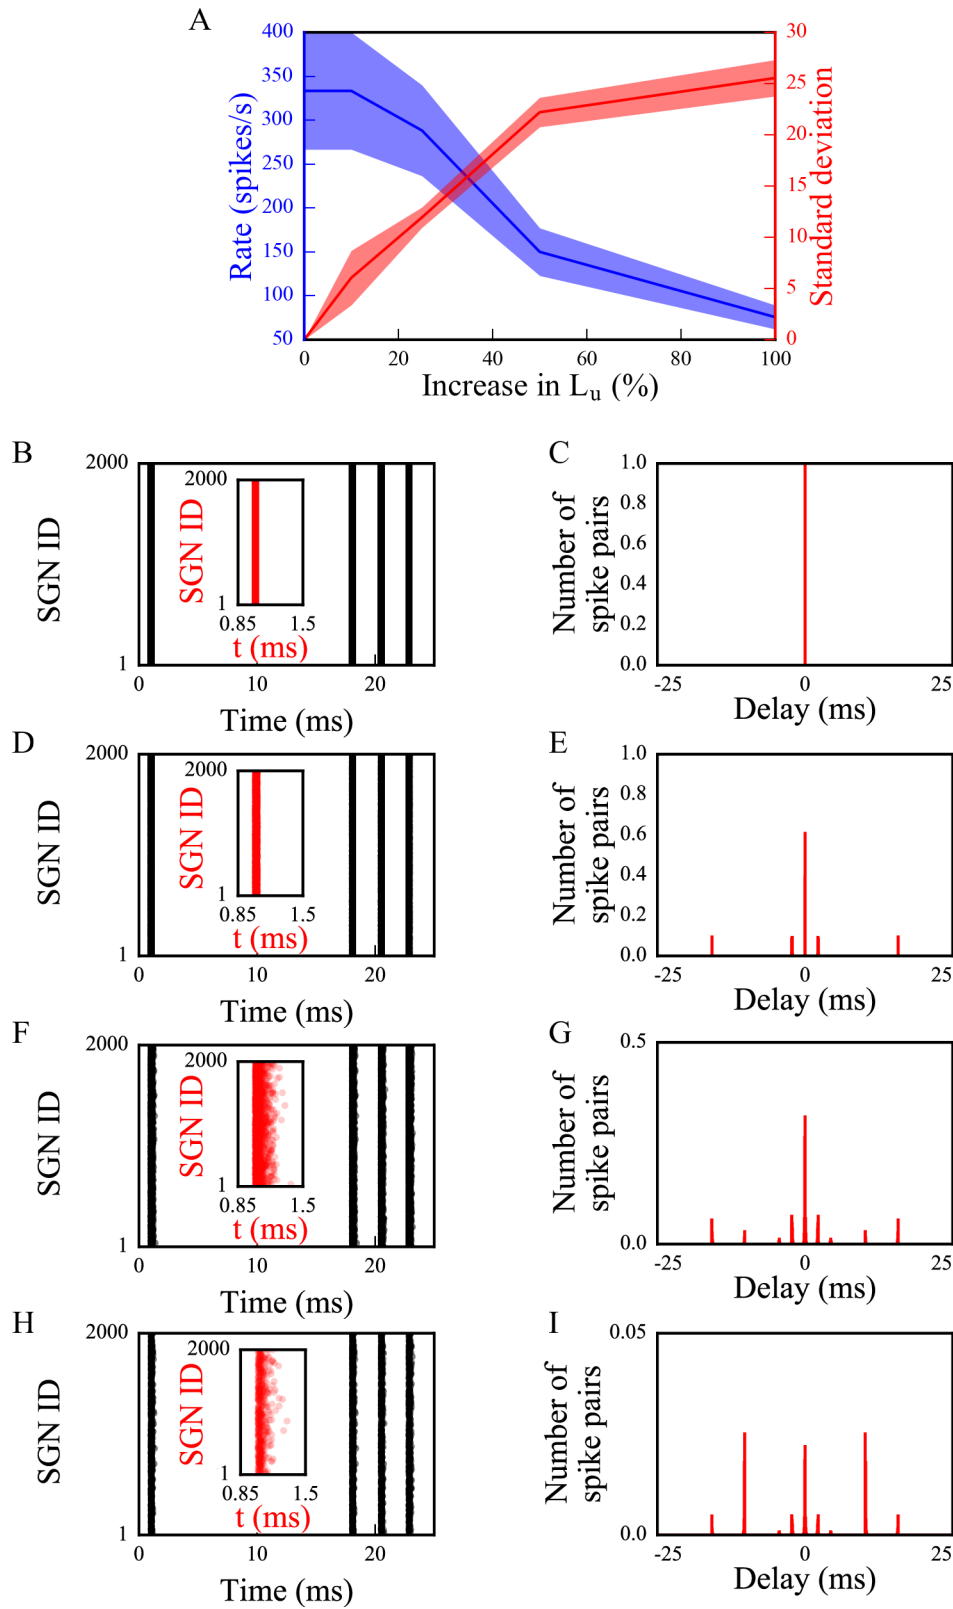

321

322 **Fig 4. The synchronous activity of SGN fiber populations is disrupted and their response to**  
323 **sound is decreased with increasing levels of  $L_u$  heterogeneity**

324 SGN fiber populations with different heterogeneity levels of  $L_u$  were stimulated using the identical  
325 simulated 90dB SPL stimulus. We assumed release events from all IHCs for the population  
326 occurred simultaneously. Raster plots of a portion of the generated spike trains [(B), (D), (F) and  
327 (H), insets: timings of first spikes] and corresponding histograms of time intervals between non-  
328 identical pairs of spike trains within a population [(C), (E), (G) and (I)] are shown for populations  
329 of SGN fibers with  $L_u=10\mu\text{m}$  (0% increase in  $L_u$ ) [(B) and (C)],  $10\mu\text{m}\leq L_u\leq 11\mu\text{m}$  (10% increase  
330 in  $L_u$ ) [(D) and (E)],  $10\mu\text{m}\leq L_u\leq 12.5\mu\text{m}$  (25% increase in  $L_u$ ) [(F) and (G)] and  $10\mu\text{m}\leq L_u\leq 20\mu\text{m}$   
331 (100% increase in  $L_u$ ) [(H) and (I)]. The ordinates of the histograms are normalized over the  
332 number of spike pairs with 0ms delay for the population where all fibers have  $L_u=10\mu\text{m}$  (C).  
333 Simulations were done 3 times. Firing rate and standard deviations of time intervals are averaged  
334 for all populations in (A), shaded area represents the standard error of the mean.  
335

336 To investigate effects of this disruption of spike generation and timing in the full model,  
337 CAPs were computed from spike responses of populations of LT, MT and HT SGN fibers subject  
338 to simulated myelinopathy. Responses of fiber populations with homogeneous initial  
339 unmyelinated segments ( $L_u$ ) or first heminode length ( $L_h$ ) values were investigated to see the  
340 gradual effect of variable myelination patterns on cumulative activity of SGN fibers. Additionally,  
341 populations with heterogeneous, random  $L_u$  or  $L_h$  values were simulated to represent a population  
342 heterogeneity induced by myelinopathy. We note that when increasing first heminode length ( $L_h$ )  
343 the number of expressed channels ( $\text{Na}^+$  and  $\text{K}^+$ ) was kept constant consequently decreasing their  
344 density. However, when increasing initial unmyelinated segment length ( $L_u$ ), the density of  
345 expressed channels was kept constant consequently increasing their number. Results were not  
346 qualitatively different when these assumptions were reversed (see Discussion section). Model  
347 results show that, in response to a simulated 70 dB SPL stimulus, CAPs computed from SGN fiber  
348 populations with homogeneous myelination patterns had decreased peak amplitude and increased  
349 latency to the peak when  $L_u$  was longer than the putative normal length of  $10\mu\text{m}$  (Fig 5A) and  $L_h$   
350 was longer than the putative normal length of  $1\mu\text{m}$  (Fig 6A). The amplitude decrease was highly  
351 significant for  $L_u > 12\mu\text{m}$  and  $L_h > 3\mu\text{m}$  with ~80% of a drop from normal without or with

352 including recruitment of additional fibers with increasing SPL (Figs 5B, C and 6B, C,  
353 respectively). This was due to the fact that at those values failure of spike generation occurred  
354 because of the increased lengths,  $L_u$  and  $L_h$ . CAP peak latencies were significantly longer than  
355 normal for all homogeneous populations, with  $L_u > 12 \mu\text{m}$  and  $L_h > 3 \mu\text{m}$  having ~40% of an  
356 increase. The changes in CAP widths were minimal for all cases, and only significant when  $L_u=13$   
357  $\mu\text{m}$  or  $L_u=14 \mu\text{m}$  and  $L_h=4 \mu\text{m}$  or  $L_h=5 \mu\text{m}$  with additional fiber recruitment (Figs 5C and 6C).  
358 For populations with heterogeneous myelination patterns, however, CAP peaks were significantly  
359 (~50%) lower, and latencies and widths were significantly higher than normal populations.

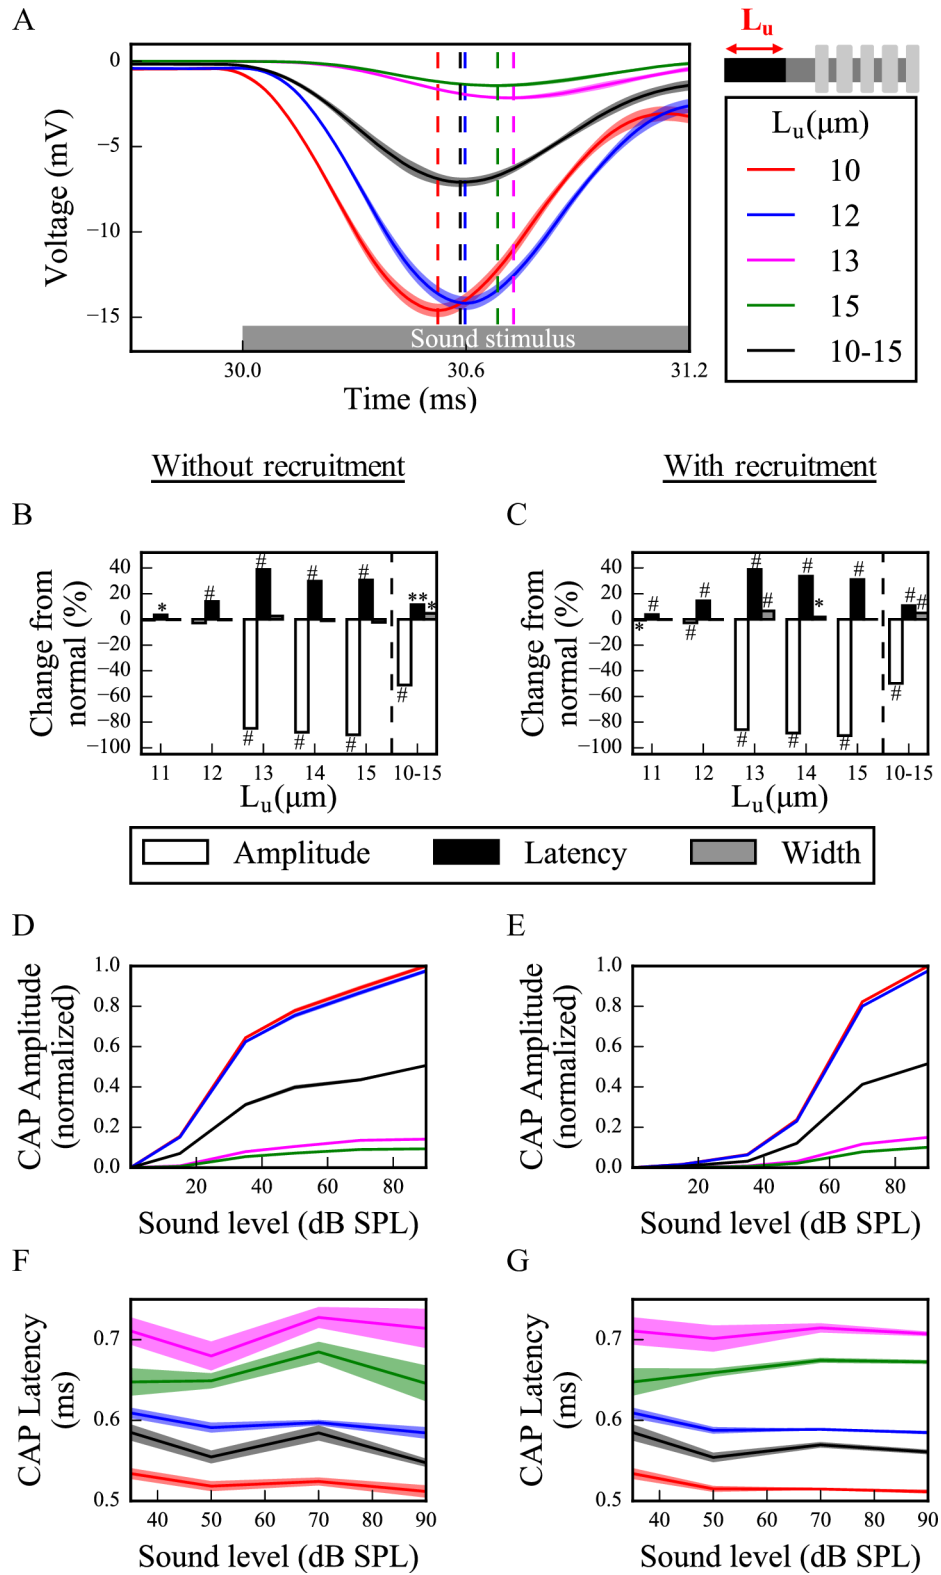

360

361 **Fig 5. Longer  $L_u$  significantly decreases and delays the peak of the sound-evoked CAPs of**  
 362 **SGN fibers.**

363 (A) Sound-evoked CAPs of SGN fiber populations with varying  $L_u$  at 70dB SPL without  
364 recruitment of additional fibers, averaged over 50 simulations. Shaded regions correspond to the  
365 standard error of the mean and dashed lines correspond to the peaks of each CAP, labeled with the  
366 same colors as the CAPs. The decrease and delay of peak CAPs are more obvious for populations  
367 with  $L_u > 12 \mu\text{m}$ . Comparison of CAP measures of each population relative to normal  $L_u$  ( $L_u = 10$   
368  $\mu\text{m}$ ) for cases without (B) and with (C) recruitment at 70 dB SPL. Latencies are significantly  
369 higher for all populations and peaks are significantly lower for populations with  $L_u > 12 \mu\text{m}$ . The  
370 increases in widths are only minimal, however significant for the heterogeneous population, where  
371  $10 \mu\text{m} \leq L_u \leq 15 \mu\text{m}$  (\* $p < 0.05$ , \*\* $p < 0.005$ , # $p < 0.0005$ ). Normalized CAP amplitudes without (D)  
372 and with (E) recruitment for various sound levels show qualitatively similar behavior, but the case  
373 with recruitment (E) exhibits a more exponential increase. The latencies of CAP peaks increase  
374 with higher  $L_u$  for all sound levels with no change along the sound levels, and similar values  
375 without (F) and with (G) recruitment.

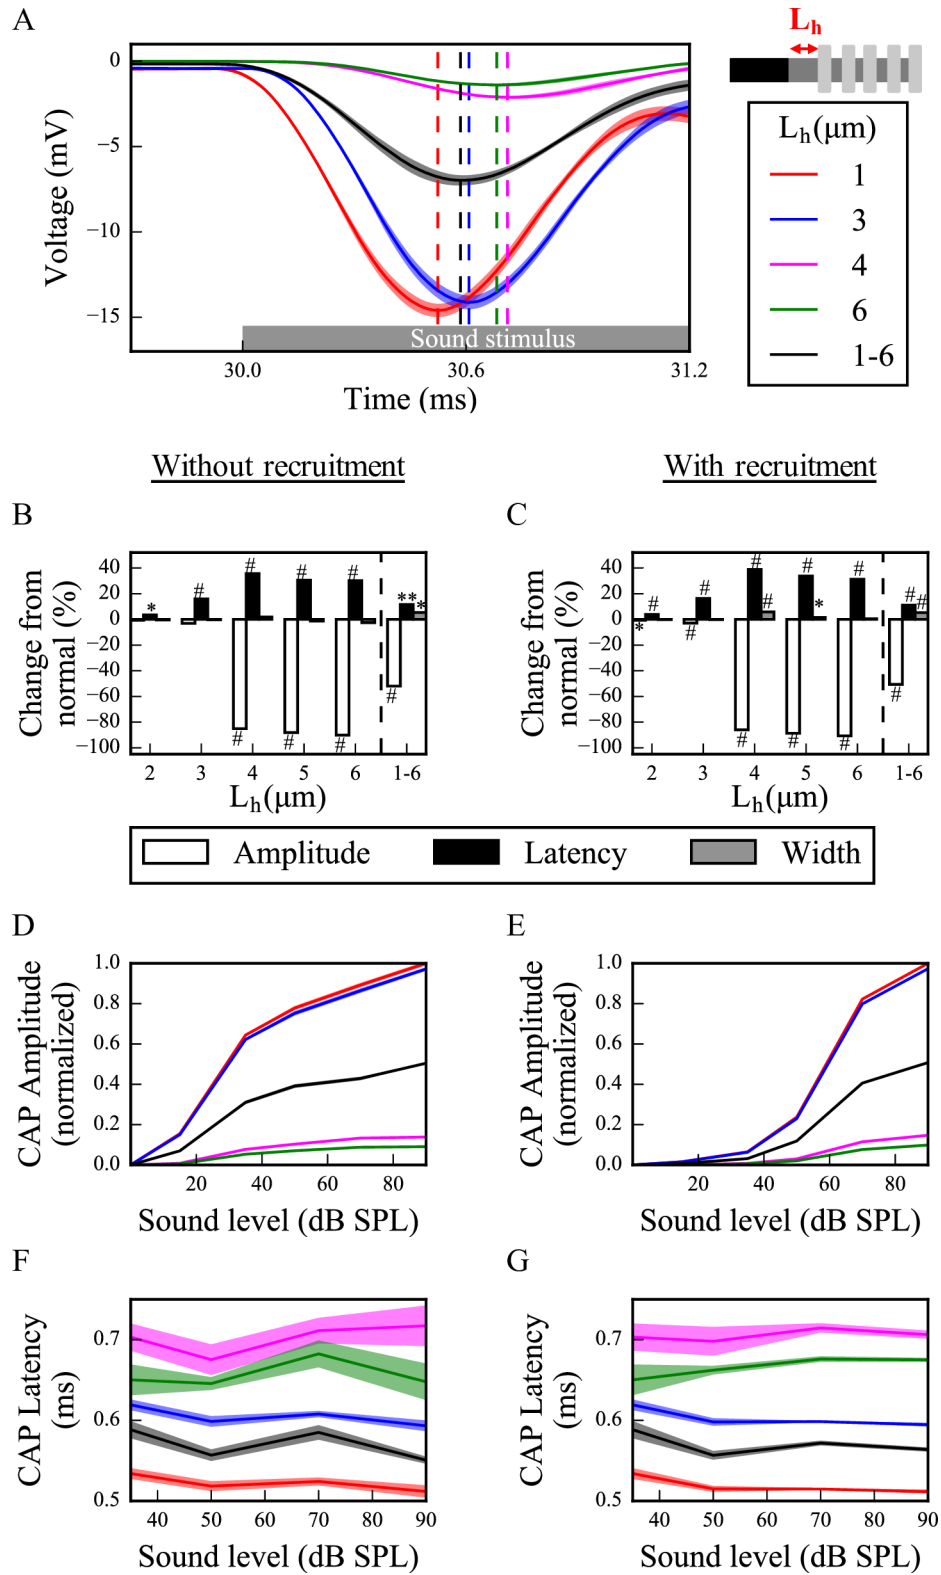

376

377 **Fig 6. Longer  $L_h$  significantly decreases and delays the peak of the sound-evoked CAPs of**  
 378 **SGN fibers.**

379 (A) Sound-evoked CAPs of SGN fiber populations of varying  $L_h$  at 70dB SPL without recruitment  
380 of additional fibers, averaged over 50 simulations. Shaded regions correspond to the standard error  
381 of the mean and dashed lines correspond to the peaks of each CAP, labeled with the same colors  
382 as the CAPs. The decreased peak amplitude and increased latency of CAP peak are more obvious  
383 for populations with  $L_h > 3 \mu\text{m}$ . Comparison of CAP measures of each population relative to the  
384 normal  $L_h$  ( $L_h = 1 \mu\text{m}$ ) without (B) and with (C) recruitment at 70 dB SPL. CAP latencies are  
385 significantly higher for all populations and peak amplitudes are significantly lower for populations  
386 with  $L_h > 3 \mu\text{m}$ . The increases in widths are only minimal, however significant for the  
387 heterogeneous population, where  $1 \mu\text{m} \leq L_h \leq 6 \mu\text{m}$  (\* $p < 0.05$ , \*\* $p < 0.005$ , # $p < 0.0005$ ). Normalized  
388 CAP amplitudes without (D) and with (E) recruitment for various sound levels show qualitatively  
389 similar behavior, but the case with recruitment (E) exhibits a more exponential increase. The  
390 latencies of CAP peaks increase with higher  $L_h$  for all sound levels with no change along the sound  
391 levels, both without (F) and with (G) recruitment.  
392

393 In addition, to assess the dependencies of CAP properties on sound intensities, we  
394 measured responses to simulated sound stimuli between 0-90 dB SPL with and without additional  
395 fiber recruitment. For  $L_u \leq 12 \mu\text{m}$  and  $L_h \leq 3 \mu\text{m}$ , CAP peak amplitudes increased with sound  
396 intensity (Figs 5D and 6D, respectively) and when fiber recruitment was included (Figs 5E and  
397 6E, respectively) the profile of increase was more similar to experimental measurements (see  
398 Supplementary Fig 4 in [6]). However, for  $L_u > 12 \mu\text{m}$  and  $L_h > 3 \mu\text{m}$ , CAP amplitudes remained  
399 small for all sound intensities, with and without recruitment, due to reduced spike generation. For  
400 populations with heterogeneous myelination patterns, CAP amplitudes were between the  $L_u = 12$   
401  $\mu\text{m}$  and  $L_u = 13 \mu\text{m}$  cases, and the  $L_h = 3 \mu\text{m}$  and  $L_h = 4 \mu\text{m}$  cases for all sound levels, reflecting  
402 reduced spike generation in some fibers of the population with higher  $L_u$  and  $L_h$  values. CAP  
403 latencies were longer for higher values of  $L_u$  and  $L_h$  with (Figs 5G and 6G) or without (Figs 5F  
404 and 6F) recruitment, but did not exhibit significant changes with varying sound level. In the  
405 heterogeneous populations, CAP latencies showed values between the  $L_u = 10 \mu\text{m}$  and  $L_u = 12 \mu\text{m}$   
406 cases and the  $L_h = 1 \mu\text{m}$  and  $L_h = 3 \mu\text{m}$  cases.

407



## 408 **Effects of synaptopathy on SGN population activation patterns**

409           There is strong evidence indicating that noise-induced synaptopathy, primarily at HT  
410 fibers, is one of the mechanisms of hidden hearing loss [8]. To simulate it, we considered responses  
411 of a population of control SGN fibers ( $L_u = 10 \mu\text{m}$ ,  $L_h = 1 \mu\text{m}$ ) with 50% of HT IHC-SGN synapses  
412 removed. To investigate the specific effect of loss of synapses on HT fibers, we compared  
413 responses to the case where the same number of synapses ( $1/6^{\text{th}}$  of whole population) were  
414 removed randomly from the whole population of three fiber types. The CAPs computed from  
415 populations with and without synaptopathy (Fig 7A) in response to a 70 dB SPL suggest that HT-  
416 targeted synaptopathy produces only a small effect on CAP peak amplitude while random  
417 synaptopathy has a much broader and significant effect on the amplitude ( $\sim 80\%$  vs  $\sim 10\%$  decrease  
418 from normal at 70dB SPL) (Figs 7B and C). Moreover, there was no latency and width changes  
419 for HT synaptopathy with or without fiber recruitment. However, random synaptopathy  
420 significantly increased width and latency with recruitment at 70dB SPL, even though the increase  
421 was minimal ( $<1\%$ ).

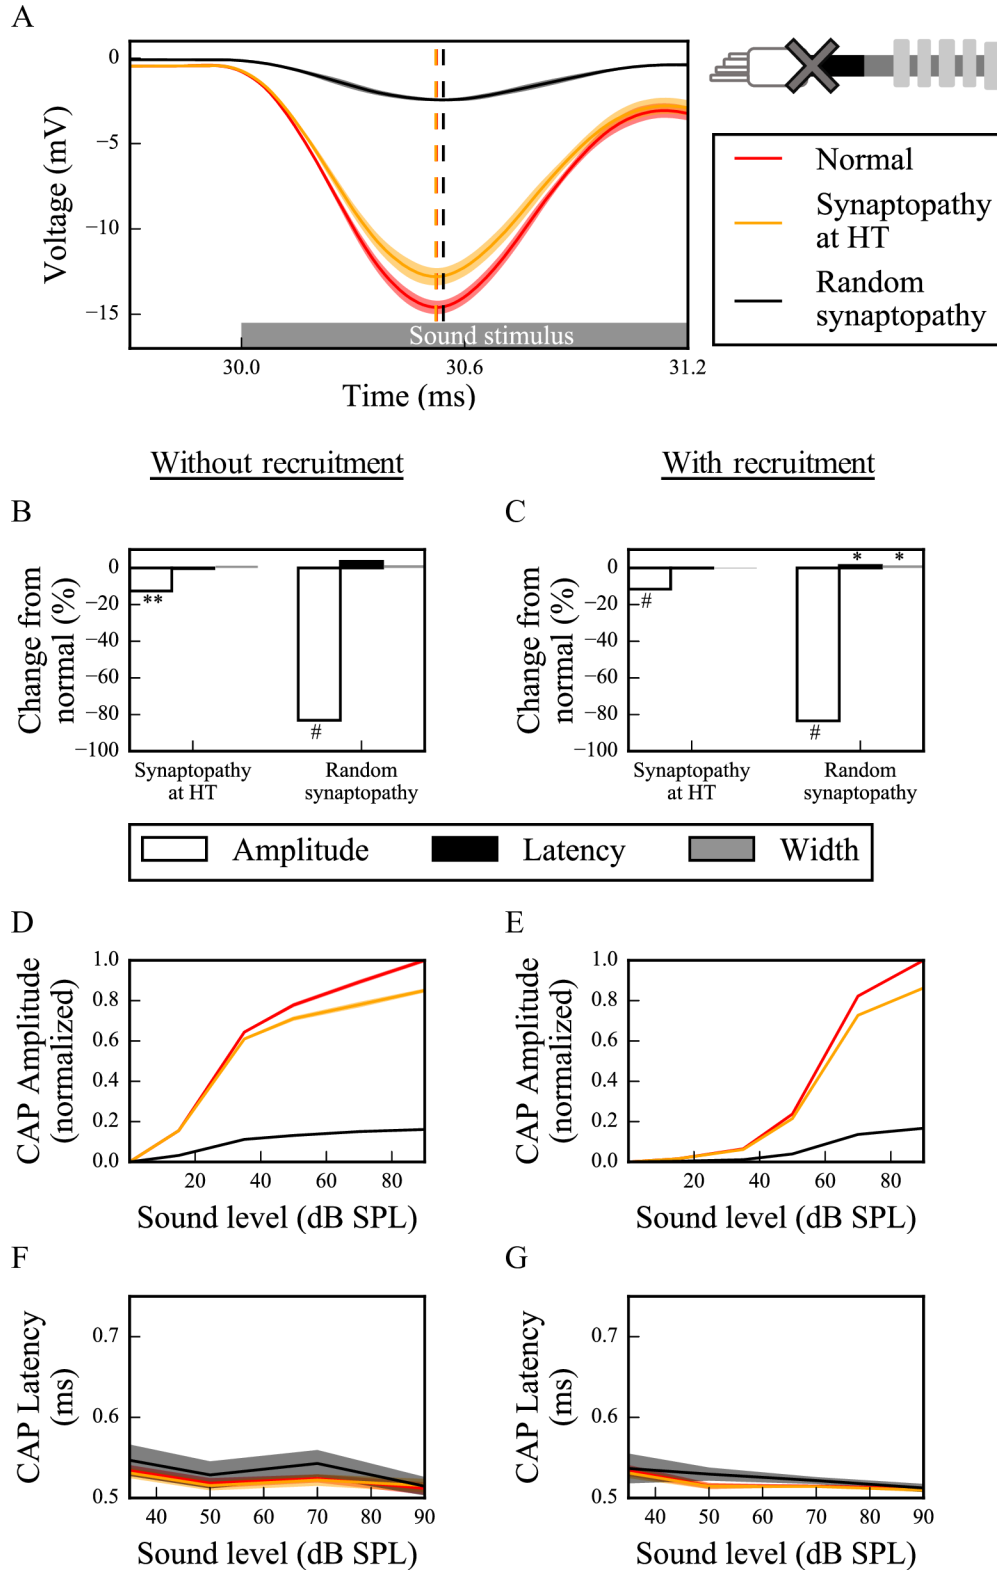

**Fig 7. Synaptopathy at IHC-SGN synapses decreases the peak of the CAP significantly, without changes to peak latency and width.**

425 (A) Sound-evoked CAPs of SGN fiber populations with different synaptopathy scenarios at 70dB  
426 SPL without recruitment of additional fibers, averaged over 50 simulations. Shaded regions  
427 correspond to the standard error of the mean and dashed lines correspond to the peaks of each  
428 CAP, labeled with the same colors as the CAPs. Synaptopathy has smaller effects on CAP peak  
429 amplitude and latency when it affects only HT fiber synapses compared to affecting all fiber types  
430 randomly. Comparison of CAP measures of synaptopathy cases relative to normal (no  
431 synaptopathy) without (B) and with (C) recruitment at 70 dB SPL (\* $p < 0.05$ , \*\* $p < 0.005$ ,  
432 # $p < 0.0005$ ). Normalized CAP amplitudes show qualitatively similar behavior without (D) and  
433 with (E) recruitment for various sound levels, but the case with recruitment exhibits a more  
434 exponential increase. The latencies of the CAP peaks do not exhibit any significant difference  
435 between without (F) and with (G) recruitment cases.  
436

437 We simulated sound intensities between 0-90 dB SPL with and without recruitment to  
438 assess how CAP peak amplitude and latency depend on sound intensities in the synaptopathic  
439 cochlear model. For random synaptopathy CAP peaks remained small for all sound intensities  
440 while for HT synaptopathy, a decrease of CAP peaks was observed for higher sound intensities.  
441 These results hold in cases with (Fig 7E) and without (Fig 7D) recruitment, but the profiles of CAP  
442 peak amplitudes are more consistent with experimental observations when fiber recruitment was  
443 included (see Supplementary Fig 4 in [6]). CAP latencies did not show any significant differences  
444 for any sound level in any synaptopathy case with or without recruitment (Figs 7F and G).

445

#### 446 **Combined effects of myelinopathy and synaptopathy of hidden hearing loss**

447 To investigate how different HHL mechanisms interact and affect cumulative SGN fiber  
448 activity, we combined them in our model (Fig 8). When HT synaptopathy (Fig 8A and B) was  
449 combined with myelinopathy affecting the length of the initial unmyelinated segment  $L_u$ , CAP  
450 peak amplitude showed significant additive decrease but latency and width showed no change  
451 beyond that produced by the myelin defects alone (compare Case 3 with Cases 1 and 2). When  
452 both myelinopathy mechanisms were combined by varying  $L_u$  and  $L_h$  across the population, both

453 CAP peak amplitude and latency showed significant additive changes (compare Case 4 with Case  
 454 2). CAP widths were significantly increased only by myelinopathy mechanisms, in response to  
 455 simulated 70dB SPL. In response to varied sound intensities between 0-90 dB SPL, the additive  
 456 effects of synaptopathy on CAP peak amplitude changes were prominent for higher SPL while  
 457 latencies showed little dependence on SPL (Figs 8C and D, respectively).

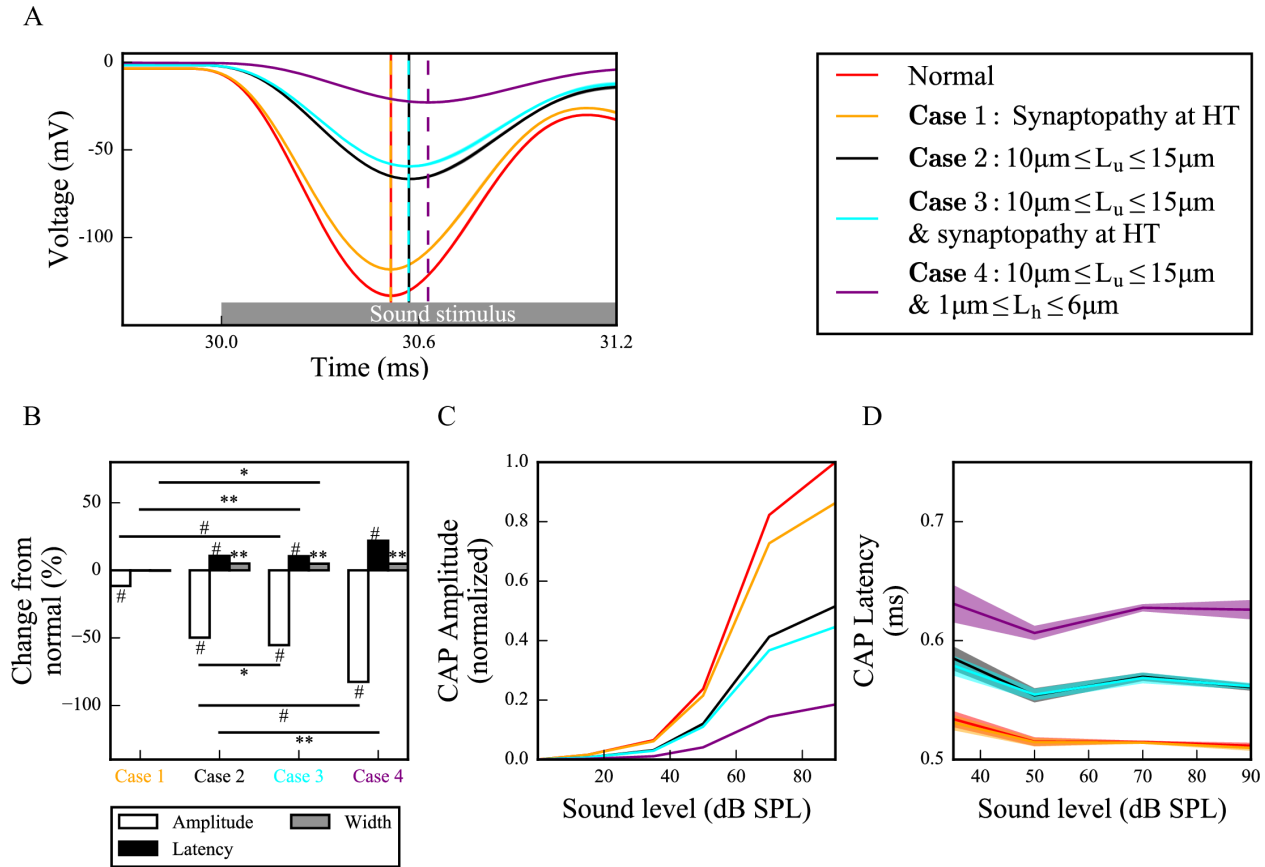

458

459 **Fig 8. Different scenarios of hidden hearing loss have additive effects on SGN activity.**

460 (A) Sound-evoked CAPs of SGN fiber populations with different myelinopathy and synaptopathy  
 461 scenarios at 70dB SPL with recruitment of additional fibers, averaged over 50 simulations (dashed  
 462 lines correspond to the peaks of each CAP, labeled with the same colors as the CAPs). Combined  
 463 synaptopathy and myelinopathy (Case 3) shows additive effects on the decrease in CAP peak  
 464 amplitude, but not on the increase in CAP peak latency (compare to Cases 1 and 2). Combined  
 465 different myelinopathies show additive effects on both CAP peak amplitude and latency (compare  
 466 Cases 2 and 4). (B) Comparison of average CAP measures for different myelinopathy and  
 467 synaptopathy cases relative to normal, and between cases with recruitment at 70 dB SPL (\* $p < 0.05$ ,  
 468 \*\* $p < 0.005$ , # $p < 0.0005$ ). Normalized CAP amplitudes (C) and CAP latencies (D) for different

469 myelinopathy and synaptopathy cases with recruitment for various sound levels, averaged over 50  
470 simulations. Shaded areas correspond to the standard error of the mean.  
471

472 In summary, model results suggest that decreases in CAP peak amplitudes show additive  
473 effects for combined synaptopathy and myelinopathy. Also, there were significant increases in  
474 CAP peak latencies and CAP widths only for myelinopathy-based mechanisms, with latencies  
475 showing additive effects in combined myelinopathies, while synaptopathies do not affect this CAP  
476 features.

477

## 478 **Discussion**

479 We built a reduced biophysical model simulating sound-evoked activity of type I SGN  
480 populations to analyze two hypotheses of the cause of HHL, synaptopathy and myelinopathy.  
481 Model SGN spike times were convolved with the unitary response of the CAP, a near-field  
482 response of SGNs, to convert spike times into cumulative activity for comparison with  
483 experimental results. The model shows that synaptopathy reduces the amplitude of the cumulative  
484 CAP response without affecting its latency due to a reduction in the number of nerve fibers  
485 responding without disruption of spike timing. In contrast, myelinopathy, when modeled as  
486 disorganization of either the initial unmyelinated nerve segment length or the heminodal spacing,  
487 causes disruption of spike timing in addition to loss of firing response, affecting both the peak  
488 amplitude and latency of the cumulative CAP. Similar results are obtained when additional fibers,  
489 associated with neighboring characteristic frequencies are recruited in response to high SPL  
490 stimuli.

491 Previously, it has been shown that noise exposure and aging cause HHL due to synapse  
492 loss at SGN-IHC synapses, which results in a decrease of ABR P1 without increases in latency or

493 thresholds [4]. Moreover, it has been hypothesized that synapse loss occurs preferentially at HT  
494 SGN-IHC synapses [8]. Consistent with experimental results, our simulations for both HT  
495 synaptopathy and random synaptopathy show that CAP latencies are unchanged for either  
496 scenario, but the amplitude of the CAP peak is significantly decreased. However, the decrease in  
497 CAP amplitude was much larger for random synaptopathy and no significant activity was observed  
498 for lower SPL stimuli, in contrast to HT synaptopathy case, where differences in SGN fiber activity  
499 appeared only with higher SPL stimuli. These results suggest that synaptopathy at HT synapses is  
500 a more likely scenario for HHL than random loss of synapses, since experimental results show that  
501 thresholds remain unchanged (Fig 7) [8].

502         As shown by Wan and Corfas (2017), myelinopathy affects the distance from the IHC-  
503 SGN synapse to the heminode and introduces heterogeneity in heminode locations across a SGN  
504 fiber population, which is likely to result in their desynchronized activity [6]. Here, we provided  
505 evidence that increasing heterogeneity of heminode locations decreases the synchronization of  
506 spike timing of SGN fiber populations. Moreover, spike rates of more heterogeneous SGN fiber  
507 populations dropped, suggesting a loss of spike generation in SGN fibers with heminodes further  
508 from IHCs (Fig 4). Our simulations of cumulative CAP signals show that myelinopathy increases  
509 the latency and the width of the peak of CAP, similar to experimental observations of ABR P1,  
510 providing support for the disruption of spike timing in SGN activity (Figs 5 and 6). In addition,  
511 the amplitude of the simulated CAP decreased with myelinopathy, reflecting the reduction of SGN  
512 spike activity.

513         Combining synaptopathy and myelinopathy HHL mechanisms led to additive effects in our  
514 model. Decreases in CAP peak amplitude were additive for combined synaptopathy and  
515 myelinopathy, but synaptopathy did not contribute to changes in CAP latency even in the

516 combined scenario. Combining myelinopathy mechanisms led to additive increases in both peak  
517 CAP amplitude and latency (Fig 8). These results match with the experimental results qualitatively,  
518 further supporting the accuracy of our model.

519 In the myelinopathy simulations, we varied the length of the initial unmyelinated segment  
520  $L_u$  keeping a constant channel density (Fig 5) and varied the length of the heminode  $L_h$  keeping  
521 constant channel numbers (Fig 6). Results show similar effects on SGN fiber activity, i.e. the  
522 populations with the same combined lengths  $L_u+L_h$  exhibit the same behavior. As evidence on how  
523 channels might be affected by the disruption of myelination patterns is lacking, we also simulated  
524 cases where  $L_u$  increases with constant channel number (S1 Fig) and  $L_h$  increases with constant  
525 channel density (S2 Fig). Results show that spreading the same number of channels over an  
526 increased  $L_u$  (S1 Fig), rather than increasing the number by keeping the channel density constant  
527 (Fig 5), decreases the  $L_u$  value at which the abrupt decrease in CAP peak occurs due to loss of  
528 spike generation. With constant channel number, CAP peaks for homogeneous populations with  
529  $L_u > 11 \mu\text{m}$  decreased ~90% from normal ( $L_u = 10 \mu\text{m}$ ) (S1B Fig). However, the same drop occurred  
530 when  $L_u > 12 \mu\text{m}$  for the constant channel density case. In contrast, varying  $L_h$  while keeping the  
531 heminode channel density constant, i.e., increasing the number of channels for larger  $L_h$ , increased  
532 the  $L_h$  value associated with the loss of spike generation up to  $6 \mu\text{m}$ , compared to  $3 \mu\text{m}$  when  
533 channel number was kept constant (Fig 6). To conclude, any of these scenarios results in  
534 qualitatively similar SGN fiber activity patterns, only affecting the  $L_u$  and  $L_h$  lengths at which loss  
535 of spike generation leads to an abrupt drop in the CAP peak.

536 To better understand the effects of myelinopathy on SGN spike generation, we additionally  
537 analyzed the population outcome of vesicle release events to the SGN fibers. As described in the  
538 Methods section, SGN response to vesicle release was simulated by applying a brief external

539 current pulse to the peripheral end of the SGN fibers. We thus calculated the probability that  
540 release events result in corresponding spikes for various amplitudes  $I_{app}$  of the external current  
541 pulse for increasing values of  $L_u$  (S3A Fig). For simulated 70dB SPL stimuli, higher  $I_{app}$  amplitudes  
542 increased spike probability for larger  $L_u$  values, leading to increases in the  $L_u$  values at which spike  
543 generation was affected. If  $L_u$  exceeded a critical value, the probability of spike generation  
544 decreased significantly. These results show that this  $L_u$  critical value required for spike generation  
545 depends on IHC-SGN synaptic efficacy.

546 To analyze the effect of sound level on SGN fiber spike probability, we ran simulations for  
547 all sound levels keeping  $I_{app}$  fixed at the default value ( $I_{app} = 0.024\text{nA}$ , solid black rectangle in S3A  
548 Fig). As described in the Methods section, increasing sound level was simulated by increasing the  
549 probability of a vesicle release event, thus leading to higher rate of release from IHCs, i.e. higher  
550 frequencies of external current pulse applications to SGN fibers. For this  $I_{app}$  value, spike  
551 generation was affected for  $L_u > 12 \mu\text{m}$  as evident in the results shown in Fig 5. For SGN fibers  
552 with  $L_u \leq 12.3 \mu\text{m}$ , spike probabilities were higher than 70% for all sound levels (S3B Fig).  
553 However, spike probabilities decreased gradually with higher sound levels due to the inability of  
554 the fibers to respond to high frequency stimulation. This means, despite more frequent release  
555 events from IHC-SGN synapses with higher sound levels, SGN fibers cannot fire with a higher  
556 frequency due to the saturation of their spike rate, resulting in decreased spike probabilities. For  
557 SGN fibers with  $L_u > 12.3 \mu\text{m}$ , spike probability was very low reflecting loss of spike generation  
558 but it increased slightly with increasing sound level, as high frequency stimulation facilitated spike  
559 generation due to temporal summation. Results for heterogeneous  $L_u$  values between 10 and 15  
560  $\mu\text{m}$  showed intermediate spike probabilities (~40%) as compared to homogeneous  $L_u$  values of 10  
561  $\mu\text{m}$ , for all sound levels.



562           Lastly, to analyze effects of myelinopathy on SGN spike latency, we averaged the time  
563 differences between each spike and the preceding release event causing the spike for populations  
564 of SGN fibers with varied homogeneous  $L_u$  values and varied sound levels (S3C Fig). The  
565 populations with  $L_u > 12 \mu\text{m}$  were not included since spikes were not reliably generated and for the  
566 heterogeneous population, the fibers with  $L_u > 12 \mu\text{m}$  were ignored. The homogeneous populations  
567 showed increased latencies with increasing  $L_u$  and the heterogeneous population's latencies were  
568 between those for  $L_u = 11 \mu\text{m}$  and  $L_u = 12 \mu\text{m}$ . Latencies showed little dependence on sound levels.  
569 However, standard deviations of spike latencies increased with sound level, presumably reflecting  
570 higher variability in spike response to higher frequency stimulation (S3D Fig). Additionally, the  
571 population with heterogeneous  $L_u$  values showed higher standard deviations for all sound levels  
572 than the homogeneous populations with  $L_u \leq 12 \mu\text{m}$ . This increase in spike timing variability is  
573 responsible for increases in the width of the cumulative CAP for the heterogeneous population  
574 shown in Fig 5.

575           In conclusion, our model results show that HHL deficits due to myelinopathy could be  
576 caused by not only loss of SGN spike activity, as in synaptopathy, but also disruption of spike  
577 timing and synchronization across a population of SGN fibers. Illumination of the underlying  
578 differences in these mechanisms for HHL based on the model may be useful for the development  
579 and testing of treatments for HHL. Moreover, the model framework may be extended to investigate  
580 mechanisms behind other peripheral auditory system disorders.

581

## 582 **References**

- 583 1. Kohrman DC, Wan G, Cassinotti L, Corfas G. Hidden Hearing Loss: A Disorder with  
584 Multiple Etiologies and Mechanisms. *Cold Spring Harb Perspect Med.* 2019. Epub  
585 2019/01/07. doi: 10.1101/cshperspect.a035493. PubMed PMID: 30617057.
- 586 2. Spankovich C, Gonzalez VB, Su D, Bishop CE. Self reported hearing difficulty, tinnitus, and  
587 normal audiometric thresholds, the National Health and Nutrition Examination Survey 1999-  
588 2002. *Hear Res.* 2017. Epub 2017/12/07. doi: 10.1016/j.heares.2017.12.001. PubMed PMID:  
589 29254853.
- 590 3. Tremblay KL, Pinto A, Fischer ME, Klein BE, Klein R, Levy S, et al. Self-Reported Hearing  
591 Difficulties Among Adults With Normal Audiograms: The Beaver Dam Offspring Study.  
592 *Ear Hear.* 2015;36(6):e290-9. doi: 10.1097/AUD.000000000000195. PubMed PMID:  
593 26164105; PubMed Central PMCID: PMC4824300.
- 594 4. Kujawa SG, Liberman MC. Adding insult to injury: cochlear nerve degeneration after  
595 "temporary" noise-induced hearing loss. *J Neurosci.* 2009;29(45):14077-85. doi:  
596 10.1523/JNEUROSCI.2845-09.2009. PubMed PMID: 19906956; PubMed Central PMCID:  
597 PMC2812055.
- 598 5. Sergeyenko Y, Lall K, Liberman MC, Kujawa SG. Age-related cochlear synaptopathy: an  
599 early-onset contributor to auditory functional decline. *J Neurosci.* 2013;33(34):13686-94.  
600 doi: 10.1523/JNEUROSCI.1783-13.2013. PubMed PMID: 23966690; PubMed Central  
601 PMCID: PMC3755715.
- 602 6. Wan G, Corfas G. Transient auditory nerve demyelination as a new mechanism for hidden  
603 hearing loss. *Nat Commun.* 2017;8:14487. Epub 2017/02/17. doi: 10.1038/ncomms14487.  
604 PubMed PMID: 28211470; PubMed Central PMCID: PMC5321746.

- 605 7. Rajan R, Cainer KE. Ageing without hearing loss or cognitive impairment causes a decrease  
606 in speech intelligibility only in informational maskers. *Neuroscience*. 2008;154(2):784-95.  
607 Epub 2008/04/04. doi: 10.1016/j.neuroscience.2008.03.067. PubMed PMID: 18485606.
- 608 8. Furman AC, Kujawa SG, Liberman MC. Noise-induced cochlear neuropathy is selective for  
609 fibers with low spontaneous rates. *J Neurophysiol*. 2013;110(3):577-86. Epub 2013/04/17.  
610 doi: 10.1152/jn.00164.2013. PubMed PMID: 23596328; PubMed Central PMCID:  
611 PMC3742994.
- 612 9. Long P, Wan G, Roberts MT, Corfas G. Myelin development, plasticity, and pathology in  
613 the auditory system. *Dev Neurobiol*. 2018;78(2):80-92. Epub 2017/09/26. doi:  
614 10.1002/dneu.22538. PubMed PMID: 28925106; PubMed Central PMCID:  
615 PMC5773349.
- 616 10. Takazawa T, Ikeda K, Murata K, Kawase Y, Hirayama T, Ohtsu M, et al. Sudden deafness  
617 and facial diplegia in Guillain-Barré Syndrome: radiological depiction of facial and acoustic  
618 nerve lesions. *Intern Med*. 2012;51(17):2433-7. Epub 2012/09/01. PubMed PMID:  
619 22975563.
- 620 11. Choi JE, Seok JM, Ahn J, Ji YS, Lee KM, Hong SH, et al. Hidden hearing loss in patients  
621 with Charcot-Marie-Tooth disease type 1A. *Sci Rep*. 2018;8(1):10335. Epub 2018/07/09.  
622 doi: 10.1038/s41598-018-28501-y. PubMed PMID: 29985472; PubMed Central PMCID:  
623 PMC6037750.
- 624 12. Kiang NY, Rho JM, Northrop CC, Liberman MC, Ryugo DK. Hair-cell innervation by spiral  
625 ganglion cells in adult cats. *Science*. 1982;217(4555):175-7. PubMed PMID: 7089553.
- 626 13. Hines ML, Carnevale NT. NEURON: a tool for neuroscientists. *Neuroscientist*.  
627 2001;7(2):123-35. doi: 10.1177/107385840100700207. PubMed PMID: 11496923.

- 628 14. Mino H, Rubinstein JT, Miller CA, Abbas PJ. Effects of electrode-to-fiber distance on  
629 temporal neural response with electrical stimulation. *IEEE Trans Biomed Eng.*  
630 2004;51(1):13-20. doi: 10.1109/TBME.2003.820383. PubMed PMID: 14723489.
- 631 15. Møller AR, Colletti V, Fiorino FG. Neural conduction velocity of the human auditory nerve:  
632 bipolar recordings from the exposed intracranial portion of the eighth nerve during vestibular  
633 nerve section. *Electroencephalogr Clin Neurophysiol.* 1994;92(4):316-20. doi:  
634 10.1016/0168-5597(94)90099-x. PubMed PMID: 7517853.
- 635 16. Woo J, Miller CA, Abbas PJ. The dependence of auditory nerve rate adaptation on electric  
636 stimulus parameters, electrode position, and fiber diameter: a computer model study. *J Assoc*  
637 *Res Otolaryngol.* 2010;11(2):283-96. Epub 2009/12/22. doi: 10.1007/s10162-009-0199-2.  
638 PubMed PMID: 20033248; PubMed Central PMCID: PMCPMC2862915.
- 639 17. Woo J, Miller CA, Abbas PJ. Biophysical model of an auditory nerve fiber with a novel  
640 adaptation component. *IEEE Trans Biomed Eng.* 2009;56(9):2177-80. Epub 2009/06/02.  
641 doi: 10.1109/TBME.2009.2023978. PubMed PMID: 19497810.
- 642 18. Glowatzki E, Fuchs PA. Transmitter release at the hair cell ribbon synapse. *Nat Neurosci.*  
643 2002;5(2):147-54. doi: 10.1038/nn796. PubMed PMID: 11802170.
- 644 19. Winter IM, Robertson D, Yates GK. Diversity of characteristic frequency rate-intensity  
645 functions in guinea pig auditory nerve fibres. *Hear Res.* 1990;45(3):191-202. PubMed  
646 PMID: 2358413.
- 647 20. Smith RL, Zwislocki JJ. Short-term adaptation and incremental responses of single auditory-  
648 nerve fibers. *Biol Cybern.* 1975;17(3):169-82. PubMed PMID: 1125344.
- 649 21. Keithley EM, Schreiber RC. Frequency map of the spiral ganglion in the cat. *J Acoust Soc*  
650 *Am.* 1987;81(4):1036-42. PubMed PMID: 3571719.

- 651 22. Liberman MC. Auditory-nerve response from cats raised in a low-noise chamber. *J Acoust*  
652 *Soc Am.* 1978;63(2):442-55. PubMed PMID: 670542.
- 653 23. Louage DH, van der Heijden M, Joris PX. Temporal properties of responses to broadband  
654 noise in the auditory nerve. *J Neurophysiol.* 2004;91(5):2051-65. doi:  
655 10.1152/jn.00816.2003. PubMed PMID: 15069097.
- 656 24. Bourien J, Tang Y, Batrel C, Huet A, Lenoir M, Ladrech S, et al. Contribution of auditory  
657 nerve fibers to compound action potential of the auditory nerve. *J Neurophysiol.*  
658 2014;112(5):1025-39. Epub 2014/05/21. doi: 10.1152/jn.00738.2013. PubMed PMID:  
659 24848461.
- 660
